# Supplementary material
Source: PubMed Central journal article supplement (PMC3939920)
Supplement: 1316209111_pnas.201316209SI.pdf [file 1316209111_pnas.201316209SI.pdf]

# Supporting Information

Lee et al. 10.1073/pnas.1316209111

## SI Materials and Methods

**Construction of a Plasmid Harboring the *proC* ORF.** Plasmid *pproC* was constructed as follows: a PCR fragment corresponding to the *proC* gene, generated by PCR with primers W481 and W482 using 14028s genomic DNA as a template, was digested with HindIII and BamHI and cloned into pBR322 digested with the same enzymes. The sequence of the resulting construct was verified by DNA sequencing.

**Construction of a Strain with Chromosomal Deletions of the *proC* or *thrB* Genes.** *Salmonella* strains deleted for the *proC* or *thrB* genes were generated by the one-step gene inactivation method (1). A chloramphenicol resistance  $\text{Cm}^R$  cassette was PCR amplified from plasmid pKD3 using primers W469/W470 (for *proC*) and W463/W464 (for *thrB*), and the resulting PCR product was integrated into the 14028s chromosome to generate EL605 (*proC*:: $\text{Cm}^R$ ) and EL601 (*thrB*:: $\text{Cm}^R$ ), respectively.

**Construction of Strains with Chromosomal Mutations in the *mgtCBR* Leader Region.** To generate strains with chromosomal mutations in the *mgtCBR* leader, we used the fusaric acid method as described

(2). DNA fragments carrying proline to either leucine or threonine codons substitutions in *mgtP* were prepared by a two-step PCR. For the first PCR, we used two sets of primer pairs 8118/W472 and W471/7308 (for leucine substitution) and 8118/W466 and W465/7308 (for threonine substitution), and 14028s genomic DNA as template. For the second PCR, we mixed the two PCR products from the first PCR as templates and amplified a DNA fragment using primers 8118 and 7308. The resulting PCR products were purified and integrated into the EG18715 chromosome and selected against tetracycline resistance  $\text{Tet}^R$  with media containing fusaric acid to generate EL606 (*mgtP*<sub>Pro→Leu</sub>) and EL611 (*mgtP*<sub>Pro→Thr</sub>), tetracycline-sensitive, ampicillin-sensitive  $\text{Tet}^S$   $\text{Amp}^S$  chromosomal mutants, respectively. The presence of the expected nucleotide substitutions was verified by DNA sequencing.

A P22 phage lysate grown in strain EG19886 was used to transduce strains EL606, EL611, and EL605 *Salmonella* selecting for tetracycline resistance to generate EL373 (*proB1657*::Tn10, *mgtP*<sub>Pro→Leu</sub>), EL417 (*proB1657*::Tn10, *mgtP*<sub>Pro→Thr</sub>), and EL625 (*proB1657*::Tn10, *proC*:: $\text{Cm}^R$ ), respectively.

1. Prost LR, et al. (2007) Activation of the bacterial sensor kinase PhoQ by acidic pH. *Mol Cell* 26(2):165–174.

2. Bader MW, et al. (2005) Recognition of antimicrobial peptides by a bacterial sensor kinase. *Cell* 122(3):461–472.





**Table S1. Bacterial strains and plasmids used in this study**

| Strain or plasmid                                      | Description                                                                                                      | Reference or source |
|--------------------------------------------------------|------------------------------------------------------------------------------------------------------------------|---------------------|
| <i>Salmonella enterica</i> serovar Typhimurium strains |                                                                                                                  |                     |
| 14028s                                                 | Wild type                                                                                                        | (1)                 |
| EG18715                                                | <i>mgtCB leader::tetRA/pKD46</i>                                                                                 | (2)                 |
| EG19886                                                | <i>proB1657::Tn10</i>                                                                                            | (3)                 |
| EL6                                                    | <i>mgtCB</i>                                                                                                     | (2)                 |
| EL341                                                  | <i>mgtM (A<sub>44-46</sub>→T)</i>                                                                                | (2)                 |
| EL373                                                  | <i>proB1657::Tn10, mgtP<sub>Pro→Leu</sub></i>                                                                    | This work           |
| EL417                                                  | <i>proB1657::Tn10, mgtP<sub>Pro→Thr</sub></i>                                                                    | This work           |
| EL601                                                  | <i>thrB::Cm<sup>R</sup></i>                                                                                      | This work           |
| EL602                                                  | <i>mgtM (A<sub>44-46</sub>→T) mgtP<sub>Pro→Thr</sub></i>                                                         | This work           |
| EL605                                                  | <i>proC::Cm<sup>R</sup></i>                                                                                      | This work           |
| EL606                                                  | <i>mgtP<sub>Pro→Leu</sub></i>                                                                                    | This work           |
| EL610                                                  | <i>mgtM (A<sub>44-46</sub>→T) mgtP<sub>Pro→Leu</sub></i>                                                         | This work           |
| EL611                                                  | <i>mgtP<sub>Pro→Thr</sub></i>                                                                                    | This work           |
| EL621                                                  | <i>thrB::Cm<sup>R</sup> mgtP<sub>Pro→Thr</sub></i>                                                               | This work           |
| EL625                                                  | <i>proB1657::Tn10, proC::Cm<sup>R</sup></i>                                                                      | This work           |
| Plasmids                                               |                                                                                                                  |                     |
| pCP20                                                  | rep <sub>pSC101</sub> <sup>ts</sup> Ap <sup>R</sup> Cm <sup>R</sup> <i>FLP</i> <sup>+</sup> λ cI857 <sup>+</sup> | (4)                 |
| pKD3                                                   | rep <sub>R6K</sub> Ap <sup>R</sup> FRT Cm <sup>R</sup> FRT                                                       | (4)                 |
| pKD46                                                  | rep <sub>pSC101</sub> <sup>ts</sup> Ap <sup>R</sup> p <sub>araBAD</sub> γ β exo                                  | (4)                 |
| pBR322                                                 | pMB1 ori, Ap <sup>R</sup> Tc <sup>R</sup>                                                                        | (5)                 |
| p <i>proC</i>                                          | pBR322- <i>proC</i>                                                                                              | This work           |

- Heithoff DM, et al. (1999) Coordinate intracellular expression of *Salmonella* genes induced during infection. *J Bacteriol* 181(3):799–807.
- Lee EJ, Groisman EA (2012) Control of a *Salmonella* virulence locus by an ATP-sensing leader messenger RNA. *Nature* 486(7402):271–275.
- Park SY, Cromie MJ, Lee EJ, Groisman EA (2010) A bacterial mRNA leader that employs different mechanisms to sense disparate intracellular signals. *Cell* 142(5):737–748.
- Prost LR, et al. (2007) Activation of the bacterial sensor kinase PhoQ by acidic pH. *Mol Cell* 26(2):165–174.
- Cromie MJ, Shi Y, Latifi T, Groisman EA (2006) An RNA sensor for intracellular Mg(2+). *Cell* 125(1):71–84.

**Table S2. Primers used in this study**

| No.  | Sequence, from 5' to 3'                                                 |
|------|-------------------------------------------------------------------------|
| 4308 | ACCGCGGTAATGCGACTAT                                                     |
| 4309 | TGCCGCGACTTTCAGACA                                                      |
| 4489 | GATGAAGACGGCCTTTCTTAA                                                   |
| 4490 | GAACCGGCAGTGAAACATCA                                                    |
| 6962 | GCAGGAGTAATATGTTGGACAGTCAC                                              |
| 6963 | GGGAGATTGCTGCCACC                                                       |
| 6970 | CCAGCAGCCGCGGTAAT                                                       |
| 6971 | TTTACGCCAGTAATTCGGATT                                                   |
| 7225 | TTCAGGGTCCATGTCGCC                                                      |
| 7226 | CCACAAAACCTTATGGATTTATGCGT                                              |
| 7308 | ATTGGCGCAAAGAATAATGATCG                                                 |
| 7530 | CAGCCCGCGCACATTC                                                        |
| 7531 | TTGTCTCTGGGATTGGCTTTCT                                                  |
| 8118 | TACGTGCAGGCATCATAACAGAGC                                                |
| W463 | GTTTGCCGATCTGTTACGGACCCTCTCATGGAAGTTAGGAGTTAACATGGTGTAGGCTGGAGCTGCTTC   |
| W464 | AAGCTGACCTGCTCATTATGGTCTTTTACAGATTATAGAGTTTCATTGATTAATATGAATATCCTCCTTAG |
| W465 | GTTTAAACACGCTTTATTTACCACACCTTAAACACGACGCTAATTGC                         |
| W466 | GCAATTAGCGTCGTGTTAAGGTGGTGGTAAATAAAGCGTGTTTAAAC                         |
| W469 | GTTAAGCTAACCATCCCCATAACACACAAACATAGGGAGTGACGAGATGGTGTAGGCTGGAGCTGCTTC   |
| W470 | GCCGGACGTAACCGCACGAAGTGGCGGCATGACGTCCAGCCGGGCTCAATATGAATATCCTCCTTAG     |
| W471 | TCATGTTTAAACACGCTTTATTTCTCCTCCTTAAACACGACGCTAATTGC                      |
| W472 | GCAATTAGCGTCGTGTTAAGAGGAGGAGAAAATAAAGCGTGTTTAAACATGA                    |
| W481 | CGCGGATCCGCGGTACAAAATTTCTTTA                                            |
| W482 | CCCAAGCTTCGAGTGCATGAACGGCTAAA                                           |
| W688 | GGATTATCCGGCTCGGGTAA                                                    |
| W689 | GAGCGCAAATGACTGGAAGAC                                                   |
| W696 | GCGCCGACATCAACGTATTT                                                    |
| W697 | GCCAACAAAGCGCAGAACTT                                                    |
| W718 | CGACCCCGACACCCATGACGGT                                                  |
| W722 | ACGACCTTCGATTACGAATGCGC                                                 |
